# Supplementary material
Source: PubMed Central journal article supplement (PMC2719397)

## Supplementary data

**Table 1** Amino acid sequences, antimicrobial effects, and hydrophobicity of peptides analysed. For determination of antimicrobial activities, *S. aureus* ATCC 29213, *E. coli* ATCC 25922 ( $4 \times 10^6$  CFU), or *C. albicans* ATCC 90028 ( $1 \times 10^5$  CFU) isolates were inoculated in 0.1% TSB agarose gel. Each 4 mm-diameter well was loaded with 6  $\mu$ l of peptide (at 100  $\mu$ M). The zones of clearance correspond to the inhibitory effect of each peptide after incubation at 37 °C for 18-24 h (mean values are presented, n=3). The hydrophobicity of peptides according to CCS (combined consensus hydrophobicity scale), Eisenberg and Kyte & Doolittle scales are provided.

| Modification | Sequence                        | RDA (zone of inhibition)            |                                 |                                   | Hydrophobicity |                       |           |
|--------------|---------------------------------|-------------------------------------|---------------------------------|-----------------------------------|----------------|-----------------------|-----------|
|              |                                 | <i>C. albicans</i><br>ATCC<br>90028 | <i>E. coli</i><br>ATCC<br>25922 | <i>S. aureus</i><br>ATCC<br>29213 | CCS            | Kyte and<br>Doolittle | Eisenberg |
| Control      | HKHGHGHGKHKHKNKGKKN             | 1.4                                 | 2.2                             | 0.8                               | -6.0           | -3.0                  | -0.8      |
| C-terminal   | HKHGHGHGKHKHKNKGKKN <b>L</b>    | 3.2                                 | 2.7                             | 2.9                               | -5.2           | -2.7                  | -0.7      |
|              | HKHGHGHGKHKHKNKGKKN <b>LL</b>   | 3.3                                 | 3.8                             | 3.8                               | -4.4           | -2.3                  | -0.7      |
|              | HKHGHGHGKHKHKNKGKKN <b>LLL</b>  | 4.7                                 | 4.9                             | 5.7                               | -3.7           | -2.0                  | -0.6      |
|              | HKHGHGHGKHKHKNKGKKN <b>WWW</b>  | 8.8                                 | 9.2                             | 6.9                               | -3.7           | -2.7                  | -0.6      |
|              | HKHGHGHGKHKHKNKGKKN <b>FFF</b>  | 7.6                                 | 8.1                             | 5.1                               | -3.6           | -2.2                  | -0.6      |
| Control      | GKHKNKGKKNKGKHNGWK              | 3.8                                 | 5.9                             | 3.2                               | -5.8           | -3.0                  | -0.8      |
| C-terminal   | GKHKNKGKKNKGKHNGW <b>KL</b>     | 4.4                                 | 6.1                             | 4.4                               | -4.9           | -2.6                  | -0.8      |
|              | GKHKNKGKKNKGKHNGW <b>KLL</b>    | 5.5                                 | 10.2                            | 4.3                               | -4.2           | -2.3                  | -0.7      |
|              | GKHKNKGKKNKGKHNGW <b>KLLL</b>   | 4.1                                 | 9.6                             | 4.9                               | -3.5           | -2.0                  | -0.6      |
|              | GKHKNKGKKNKGKHNGW <b>KWWW</b>   | 7.8                                 | 9.4                             | 7.2                               | -3.5           | -2.7                  | -0.7      |
|              | GKHKNKGKKNKGKHNGW <b>KFFF</b>   | 8.0                                 | 8.5                             | 7.2                               | -3.4           | -2.1                  | -0.6      |
| N-terminal   | <b>L</b> HKHGHGHGKHKHKNKGKKN    | 0.9                                 | 2.3                             | 2.0                               | -5.2           | -2.7                  | -0.7      |
|              | <b>LL</b> HKHGHGHGKHKHKNKGKKN   | 1.9                                 | 2.8                             | 2.9                               | -4.4           | -2.3                  | -0.7      |
|              | <b>LLL</b> HKHGHGHGKHKHKNKGKKN  | 4.5                                 | 5.9                             | 3.6                               | -3.7           | -2.0                  | -0.6      |
|              | <b>AAAA</b> HKHGHGHGKHKHKNKGKKN | 1.5                                 | 2.2                             | 2.1                               | -5.3           | -2.3                  | -0.6      |
|              | <b>IIII</b> HKHGHGHGKHKHKNKGKKN | 4.5                                 | 4.4                             | 4.1                               | -3.8           | -1.9                  | -0.6      |
|              | <b>VVVH</b> KHGHGHGKHKHKNKGKKN  | 4.7                                 | 3.7                             | 4.1                               | -4.5           | -2.5                  | -0.6      |
|              | <b>PPPH</b> KHGHGHGKHKHKNKGKKN  | 4.6                                 | 2.2                             | 0.0                               | -5.2           | -3.1                  | -0.7      |
|              | <b>YYYY</b> HKHGHGHGKHKHKNKGKKN | 5.8                                 | 7.1                             | 4.5                               | -4.8           | -2.8                  | -0.7      |
|              | <b>FFHK</b> HKHGHGHGKHKHKNKGKKN | 6.1                                 | 7.9                             | 4.4                               | -5.2           | -2.7                  | -0.7      |
|              | <b>FFHK</b> HKHGHGHGKHKHKNKGKKN | 3.7                                 | 2.3                             | 3.3                               | -4.4           | -2.4                  | -0.6      |
|              | <b>FFFH</b> KHGHGHGKHKHKNKGKKN  | 4.5                                 | 8.9                             | 4.1                               | -3.6           | -2.2                  | -0.6      |
|              | <b>WHKH</b> HKHGHGHGKHKHKNKGKKN | 4.0                                 | 4.3                             | 4.1                               | -5.2           | -2.9                  | -0.7      |
|              | <b>WWHK</b> HKHGHGHGKHKHKNKGKKN | 5.1                                 | 3.5                             | 3.6                               | -4.4           | -2.8                  | -0.7      |
|              | <b>WWWH</b> KHGHGHGKHKHKNKGKKN  | 7.0                                 | 9.0                             | 4.7                               | -3.7           | -2.7                  | -0.6      |
|              | <b>LLL</b> NKKGKKNKHGHGHGHKH    | 5.9                                 | 4.9                             | 4.0                               | -3.7           | -2.0                  | -0.6      |
|              | <b>WWW</b> HKHGHGHGKHKHKNKGKKN  | 5.8                                 | 8.3                             | 5.1                               | -2.8           | -2.6                  | -0.6      |
|              | <b>FFFF</b> HKHGHGHGKHKHKNKGKKN | 7.7                                 | 8.1                             | 3.9                               | -2.8           | -1.8                  | -0.5      |
|              | <b>LLLL</b> LKHGHGHGKHKHKNKGKKN | 8.2                                 | 8.1                             | 3.9                               | -2.8           | -1.6                  | -0.5      |
|              | <b>IIII</b> HKHGHGHGKHKHKNKGKKN | 4.8                                 | 5.9                             | 3.4                               | -3.0           | -1.5                  | -0.5      |
|              | <b>LGK</b> HKNKGKKNKGKHNGWK     | 3.5                                 | 4.0                             | 2.6                               | -4.9           | -2.6                  | -0.8      |
|              | <b>LLG</b> KHKNKGKKNKGKHNGWK    | 4.2                                 | 7.5                             | 3.4                               | -4.2           | -2.3                  | -0.7      |
|              | <b>LLL</b> GKHKNKGKKNKGKHNGWK   | 5.2                                 | 7.2                             | 3.7                               | -3.5           | -2.0                  | -0.6      |
|              | <b>AAAG</b> KHKNKGKKNKGKHNGWK   | 3.4                                 | 5.4                             | 2.8                               | -5.1           | -2.3                  | -0.7      |
|              | <b>IIIG</b> KHKNKGKKNKGKHNGWK   | 4.8                                 | 6.6                             | 3.3                               | -3.6           | -1.9                  | -0.6      |
|              | <b>FFF</b> GKHKNKGKKNKGKHNGWK   | 5.9                                 | 7.5                             | 3.9                               | -3.4           | -2.1                  | -0.6      |
|              | <b>WWW</b> GKHKNKGKKNKGKHNGWK   | 7.1                                 | 9.8                             | 4.1                               | -3.5           | -2.7                  | -0.7      |

**Fig. 1.** (A) Antimicrobial activity and effects of various hydrophobic amino acid modifications (upper panel) and their location (lower panel). For determination of antimicrobial activities, *E. coli* ATCC 25922, *S. aureus* ATCC 29213 ( $4 \times 10^6$  CFU) or *C. albicans* ATCC 90028 ( $1 \times 10^5$ ) isolates were inoculated in 0.1% TSB agarose gel. Each 4 mm-diameter well was loaded with 6  $\mu$ l of peptides at 100  $\mu$ M. The zones of clearance correspond to the inhibitory effect of each peptide after incubation at 37 °C for 18-24 h (mean values are presented, n=3). (B) Effect of W- (left panel) and F-tag length (right panel) on GKH17 peptide activity (at 50  $\mu$ M) against *E. coli* ATCC 25922 as assessed by RDA in the presence and absence of 0.15 M NaCl. *E. coli* ( $4 \times 10^6$  CFU) was inoculated in 0.1% TSB agarose gel. Each 4 mm-diameter well was loaded with 6  $\mu$ l (100)  $\mu$ M of the indicated peptides. The zones of clearance correspond to the inhibitory effect of each peptide after incubation at 37 °C for 18-24 h (mean values are presented, n=3). “\*” denotes no detectable clearance zone. (C) Effects of F-modified GKH17 peptides on HaCaT cells. The MTT-assay (upper panel) was used to measure viability of HaCaT keratinocytes in the presence of GKH17 and GKH17 peptides with variable F additions. In the assay, MTT is modified into a dye, blue formazan, by enzymes associated with metabolic activity. The absorbance of the dye was measured at 550 nm. Cell-permeabilizing effects of the indicated peptides (lower panel) were measured by the LDH based TOX-7 kit (mean values are presented, n=3). Results are shown in the absence (left) and presence (right) of 20% human serum. (D) Hydrophobic modification of antimicrobial peptides from HB-EGF (GKR22) and amphiregulin (PKR21) increases their bactericidal activity. Antimicrobial activity of the indicated peptides was assessed by radial diffusion assay (RDA) against *E. coli* ATCC 25922 at the indicated concentration (mean values are presented, n=3).

**Fig. 2.** (A) CD spectra of GKH17 variants in Tris buffer (left panel) and the same buffer supplemented by LPS (middle panel), or negatively charged DOPE/DOPG (75/25 mol/mol) liposomes (right panel). (B) Fluorescence spectra of W residues of GKH17-WWW (1  $\mu$ M) in 10 mM Tris, pH 7.4, in the absence and presence of DOPE/DOPG liposomes. (C) Dynamic light scattering data on hydrodynamic diameter of GKH17-WWW and GKH17 at a peptide concentration of 10  $\mu$ M in 10 mM Tris, pH 7.4. (D) LPS- and heparin-binding abilities of GKH17 and the indicated W-modified peptides. Peptides immobilized on membranes were incubated with radioiodinated LPS (*E. coli*), or heparin, washed, and radioactivity visualised.

**Fig. 3.** (A) Antimicrobial activity and effects of uncharged SSS10, negatively charged DDD10, their WWW-modified variants, and the WWW tripeptide. For determination of antimicrobial activities, *E. coli* ATCC 25922 or *S. aureus* ATCC 29213 ( $4 \times 10^6$  CFU) isolates were inoculated in 0.1% TSB agarose gel. Each 4 mm-diameter well was loaded with 6  $\mu$ l of peptides at 100  $\mu$ M. The zones of clearance correspond to the inhibitory effect of each peptide after incubation at 37 °C for 18-24 h (mean values are presented, n=3). “\*” denotes no detectable clearance zone. (B) Hemolysis of the same peptides. Erythrocytes were incubated with peptides at 60  $\mu$ M, and 2% Triton X-100 served as positive control. The absorbance of hemoglobin release was measured at 540 nm and is expressed as % of Triton X-100 induced hemolysis (note scale of y-axis).

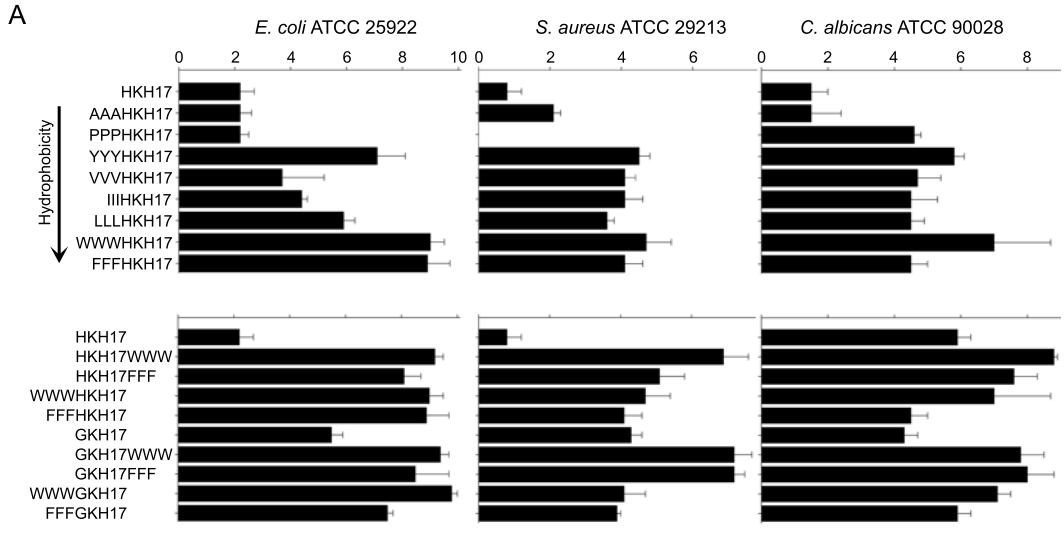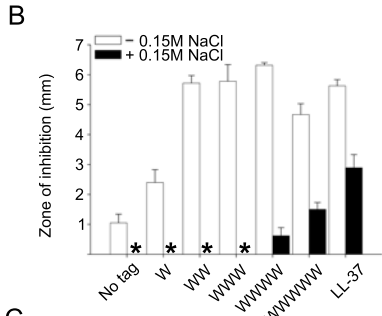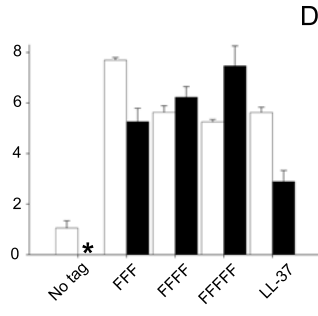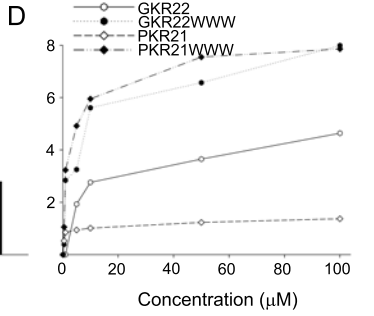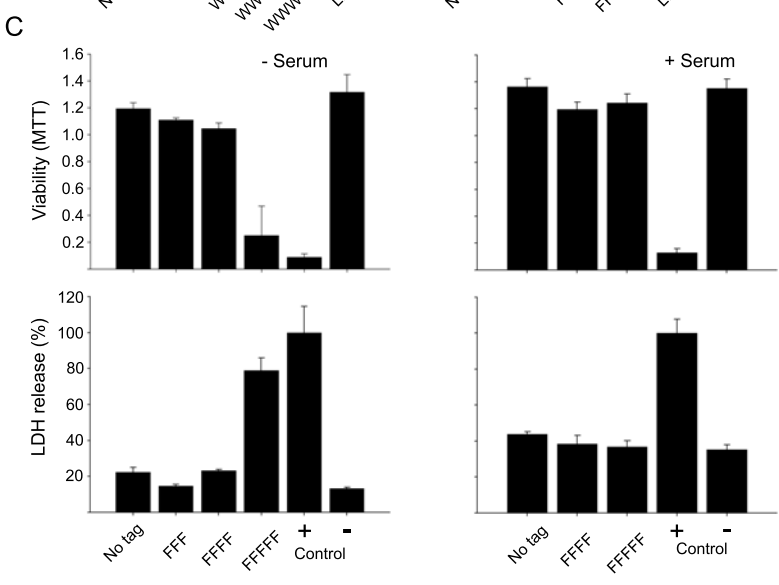

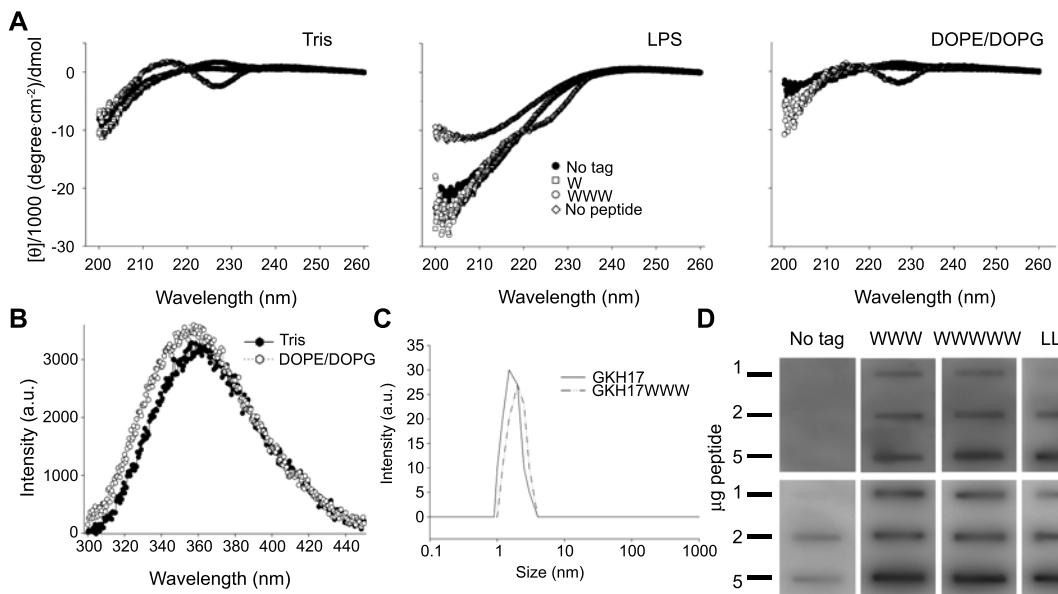

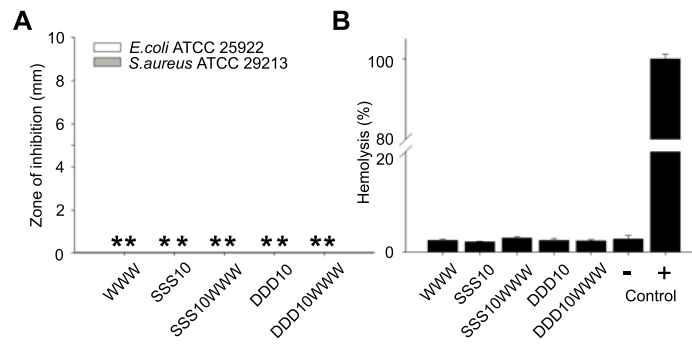

Supplement: supp_M109.011650_jbc.M109.011650-1.pdf [file supp_M109.011650_jbc.M109.011650-1.pdf]
